# Supplementary material for: Pyridine-bridged diketopyrrolopyrrole conjugated polymers for field-effect transistors and polymer solar cells
Source: Royal Society of Chemistry journal article supplement (doi:10.1039/c5py00538h), 2015-01-01
Supplement: c5py00538h1.pdf [file c5py00538h1.pdf]

## Supporting Information

### **Pyridine-bridged diketopyrrolopyrrole conjugated polymers for field-effect transistors and polymer solar cells**

Xiaotao Zhang,<sup>a</sup> Chengyi Xiao,<sup>a</sup> Andong Zhang,<sup>a</sup> Fangxu Yang,<sup>a</sup> Huanli Dong,<sup>a</sup>  
Zhaohui Wang,<sup>a</sup> Xiaowei Zhan,<sup>b</sup> Weiwei Li\*<sup>a</sup> and Wenping Hu\*<sup>a,c</sup>

<sup>a</sup> *Beijing National Laboratory for Molecular Sciences, CAS Key Laboratory of Organic Solids, Institute of Chemistry, Chinese Academy of Sciences, Beijing 100190, P. R. China. E-mail: [liweiwei@iccas.ac.cn](mailto:liweiwei@iccas.ac.cn) or [huwp@iccas.ac.cn](mailto:huwp@iccas.ac.cn)*

<sup>b</sup> *Department of Materials Science and Engineering, College of Engineering, Peking University, Beijing 100871, China*

<sup>c</sup> *Collaborative Innovation Center of Chemical Science and Engineering (Tianjin) & Department of Chemistry, School of Science, Tianjin University, Tianjin 300072, China*

The supporting information contains GPC curves of DPP polymers (Fig. S1), absorption spectra of the polymers in chloroform (Fig. S2), Dihedral angle between the planes of pyridine-DPP and alternated aromatic units (Fig. S3), X-ray diffraction patterns and GIWAXS of the DPP polymers thin films (Fig. S4 and Fig. S5), Solar cell parameters of the DPP polymers with [70]PCBM (1:2) spin coated from chloroform with 3% vol. 1-CN (Table S1) and synthesis procedure, optical and photovoltaic properties based on OD-PDPP2PyT (Scheme S1, Fig. S6 and Table S2).

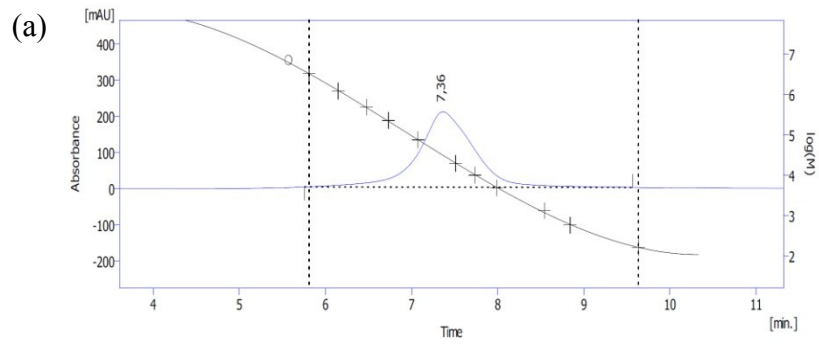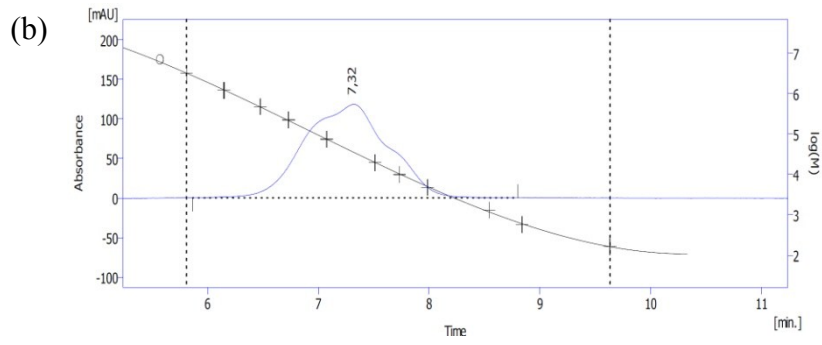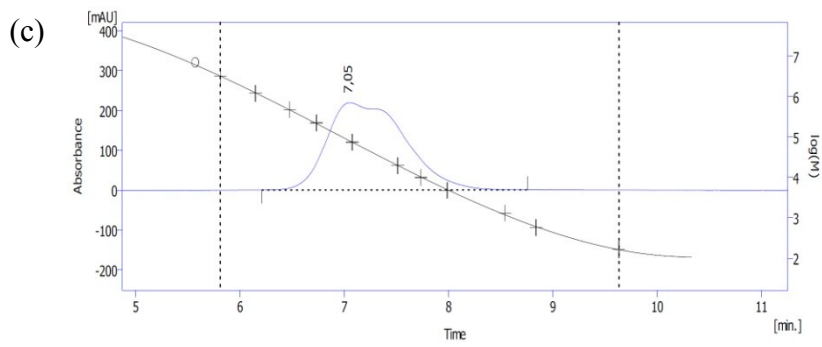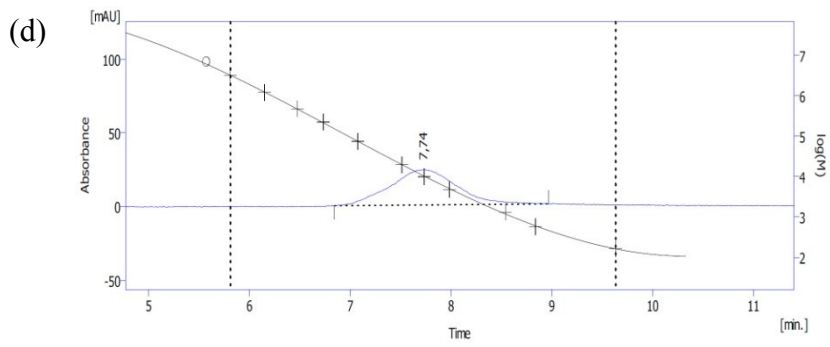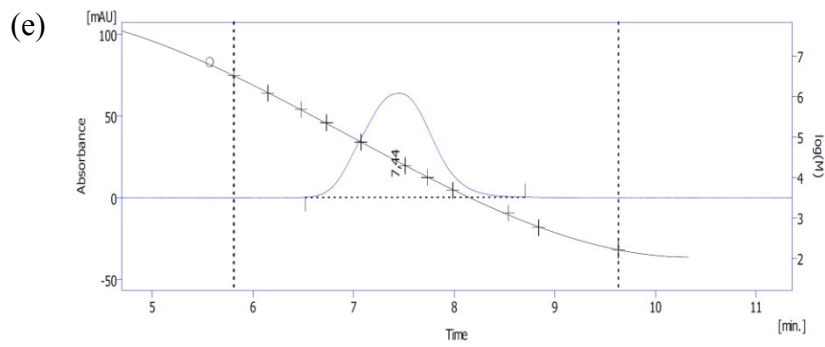

**Fig. S1** GPC recorded at 140 °C with *o*-DCB as eluent for the pyridine-bridged DPP polymers: (a) PDPP2Py2oT, (b) PDPP2PyBDT, (c) PDPP2PyT, (d) PDPP2PyBTD and (e) PDPP2PyNDI.

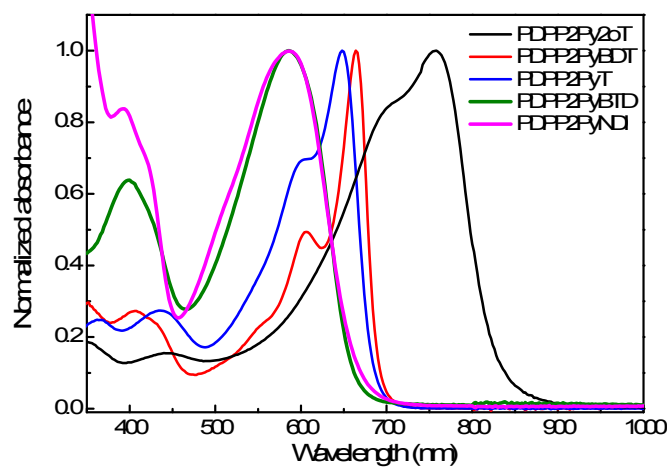

**Fig. S2** Optical absorption spectra of the pyridine-bridged DPP polymers in chloroform solution.

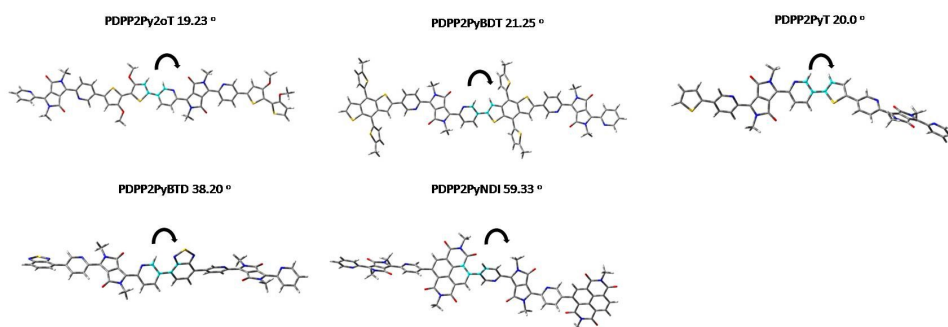

**Fig. S3** Dihedral angle between the planes of pyridine-DPP and alternated aromatic units.

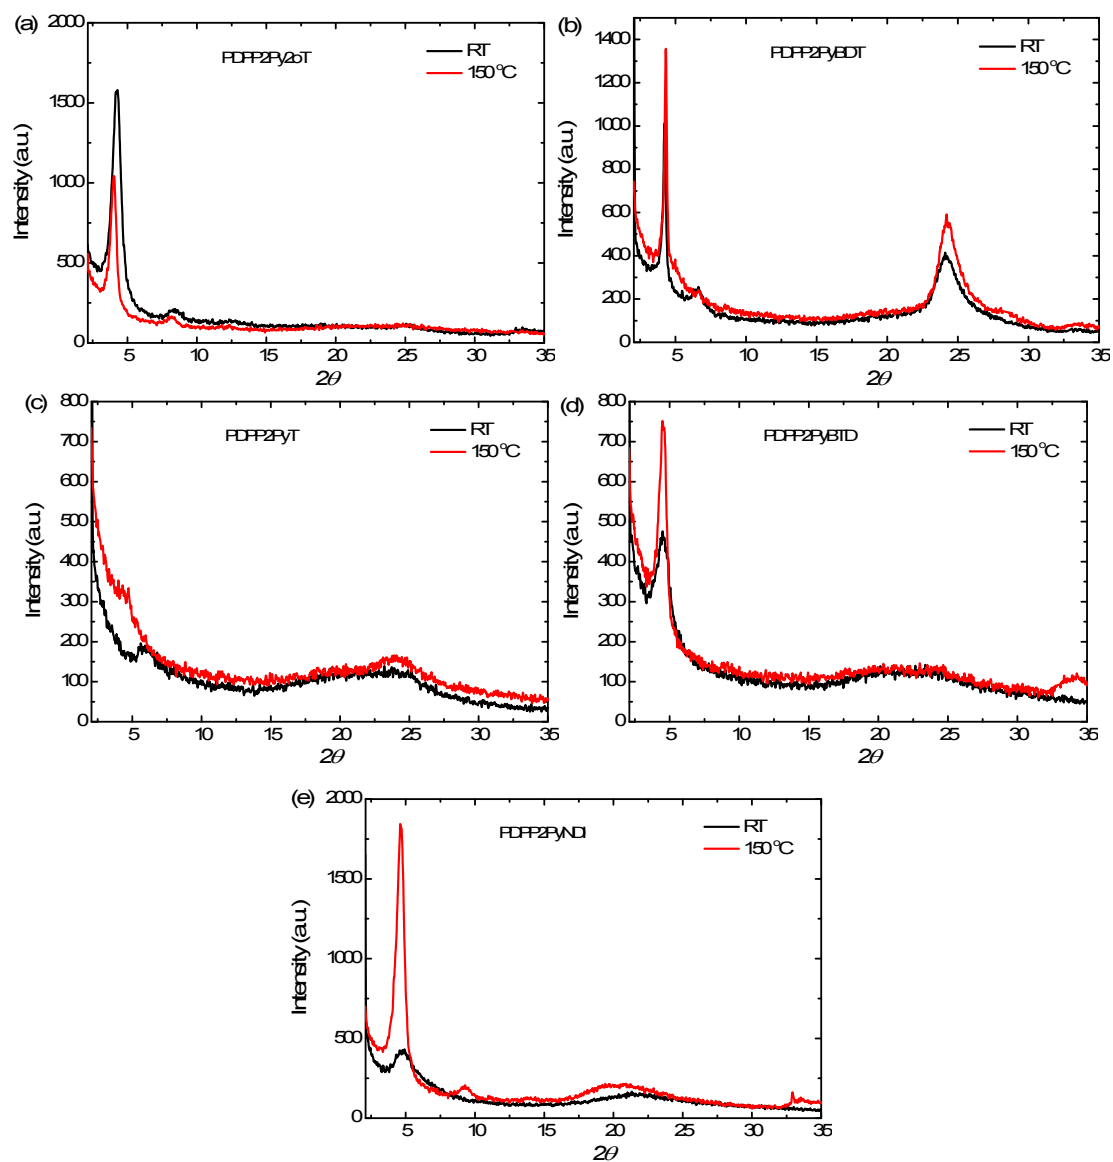

**Fig. S4** X-ray diffraction patterns of thin films of the DPP polymers without thermal annealing (black line) and with thermal annealing at 150 °C for 10 min (red line). *d*-Spacings for PDPP2Py2oT, PDPP2PyBDT, PDPP2PyT, PDPP2PyBTD and PDPP2PyNDI are 2.08 nm, 2.05 nm, 1.87 nm, 1.97 nm and 1.92 nm. Lamellar spacings for PDPP2PyBDT are 0.37 nm.

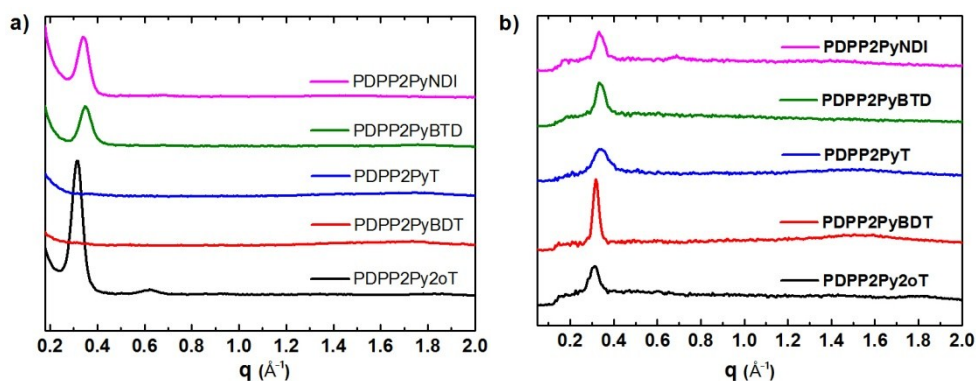

**Fig. S5** (a) Out-of-plane and (b) In-plane profile of the pyridine-bridged DPP polymers thin films annealed at 150 °C for 10 min.

**Table S1.** Solar cell parameters of the DPP polymers with [70]PCBM (1:2) spin coated from chloroform with 3% vol. 1-CN or 10% vol. *o*-DCB.

| Polymer    | Solvent                              | $J_{sc}$              | $V_{oc}$ | FF   | PCE  |
|------------|--------------------------------------|-----------------------|----------|------|------|
|            |                                      | (mA/cm <sup>2</sup> ) | (V)      | (%)  | (%)  |
| PDPP2Py2oT | CHCl <sub>3</sub> :3% 1-CN           | 4.5                   | 0.53     | 0.45 | 1.1  |
| PDPP2Py2oT | CHCl <sub>3</sub> :10% <i>o</i> -DCB | 3                     | 0.53     | 0.29 | 0.46 |
| PDPP2PyBDT | CHCl <sub>3</sub> :3% 1-CN           | 3.5                   | 0.88     | 0.47 | 1.4  |
| PDPP2PyBDT | CHCl <sub>3</sub> :10% <i>o</i> -DCB | 2.8                   | 0.72     | 0.59 | 1.18 |
| PDPP2PyT   | CHCl <sub>3</sub> :3% 1-CN           | 1.3                   | 0.88     | 0.45 | 0.5  |
| PDPP2PyT   | CHCl <sub>3</sub> :10% <i>o</i> -DCB | 2.1                   | 0.74     | 0.52 | 0.81 |

### Synthesis of OD-PDPP2PyT and their optical and photovoltaic properties

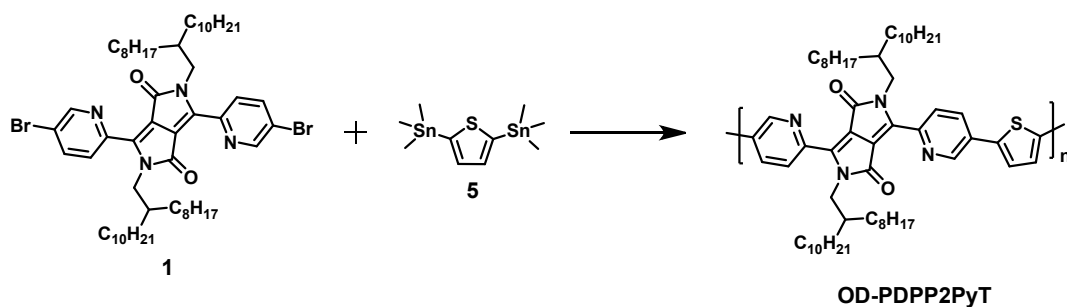

#### Scheme S1 Synthetic procedure for the polymer OD-PDPP2PyT.

Same procedure as for **PDPP2Py2oT** was used, but now **1** (98.68 mg, 0.098 mmol) and **2**, 5-bis(trimethylstannyl)thiophene (**5**) (40.07 mg, 0.098 mmol) were used as the monomers. Yield: 55 mg (60%). GPC (*o*-DCB, 140 °C):  $M_n = 39.9 \text{ kg mol}^{-1}$ , PDI = 3.76. Anal. Calcd. for C<sub>60</sub>H<sub>90</sub>N<sub>4</sub>O<sub>2</sub>S: C, 77.37; H, 9.74; N, 6.02. Found: C, 76.31; H, 9.61; N, 5.79.

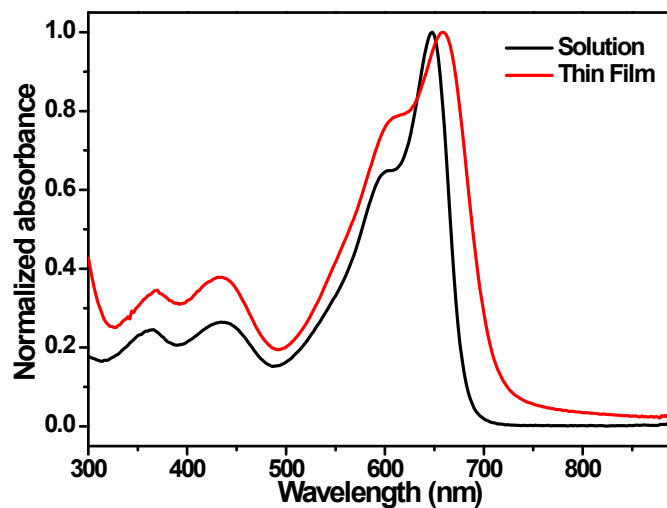

**Fig. S6** Optical absorption spectra of OD-PDPP2PyT in chloroform solution and thin films. The absorption onset in thin film is 709 nm and  $E_g^{\text{film}} = 1.75$  eV.

**Table S2.** Solar cell parameters of OD-PDPP2PyT:[70]PCBM (1:2) spin coated from chloroform with 5% vol. DIO, 3% vol. 1-CN or 10% vol. *o*-DCB. The thickness of the active layers is around 90 nm

| Solvent                              | $J_{\text{sc}}$<br>(mA/cm <sup>2</sup> ) | $V_{\text{oc}}$<br>(V) | FF   | PCE<br>(%) |
|--------------------------------------|------------------------------------------|------------------------|------|------------|
| CHCl <sub>3</sub> :5% DIO            | 1.9                                      | 0.81                   | 0.29 | 0.43       |
| CHCl <sub>3</sub> :3% 1-CN           | 0.9                                      | 0.66                   | 0.44 | 0.26       |
| CHCl <sub>3</sub> :10% <i>o</i> -DCB | 0.8                                      | 0.6                    | 0.39 | 0.19       |
